# Supplementary material for: EEG Dynamics of Error Processing and Associated Behavioral Adjustments in Preschool Children
Source: MDPI journal article supplement (doi:10.3390/brainsci13040575), 2023-03-29
Supplement: s1 [file s1]

## Supplemental Material S2

### Normality and Homogeneity analyses of behavioral and neural variables

**Table S2 1.**

*Normality and Homogeneity analyses for behavioral measures*

|                               | Normality |           |          | Homoscedasticity |            |            |          |
|-------------------------------|-----------|-----------|----------|------------------|------------|------------|----------|
|                               | <i>SW</i> | <i>df</i> | <i>p</i> | <i>L</i>         | <i>df1</i> | <i>df2</i> | <i>p</i> |
| <i>Correct-trial RT</i>       | .992      | 91        | .876     | 6.69             | 1          | 180        | .010     |
| <i>Error-trial RT</i>         | .977      | 91        | .110     |                  |            |            |          |
| <i>Post-correct slowing</i>   | .990      | 91        | .731     | 42.51            | 1          | 180        | <.001    |
| <i>Post-error slowing</i>     | .992      | 91        | .874     |                  |            |            |          |
| <i>Post-correct accuracy</i>  | .969      | 91        | .030     | 3.21             | 1          | 180        | .075     |
| <i>Post-error accuracy</i>    | .978      | 91        | .133     |                  |            |            |          |
| <i>Correct-trial RT*</i>      | .980      | 91        | .178     | 15.57            | 1          | 179        | <.001    |
| <i>Error-trial RT*</i>        | .991      | 90        | .816     |                  |            |            |          |
| <i>Post-correct slowing*</i>  | .800      | 91        | <.001    | .04              | 1          | 179        | .838     |
| <i>Post-error slowingT</i>    | .970      | 90        | .038     |                  |            |            |          |
| <i>Post-correct accuracy*</i> | .964      | 91        | .012     | 2.41             | 1          | 179        | .122     |
| <i>Post-error accuracy*</i>   | .971      | 90        | .045     |                  |            |            |          |
| <i>RSI - 1st tertile</i>      | .980      | 66        | .357     |                  |            |            |          |
| <i>RSI – 2nd tertile</i>      | .953      | 66        | .013     | 9.54             | 2          | 195        | <.001    |
| <i>RSI – 3rd tertile</i>      | .939      | 66        | .003     |                  |            |            |          |
| <i>PEA – 1st tertile</i>      | .980      | 66        | .370     |                  |            |            |          |
| <i>PEA – 2nd tertile</i>      | .969      | 66        | .099     | .37              | 2          | 195        | .691     |
| <i>PEA – 3rd tertile</i>      | .928      | 66        | .001     |                  |            |            |          |
| <i>RSI_T - 1st tertile</i>    | .974      | 66        | .179     |                  |            |            |          |
| <i>RSI_T – 2nd tertile</i>    | .923      | 66        | .001     | 25.71            | 2          | 195        | <.001    |
| <i>RSI_T – 3rd tertile</i>    | .911      | 66        | <.001    |                  |            |            |          |
| <i>PEA_T – 1st tertile</i>    | .972      | 66        | .149     |                  |            |            |          |
| <i>PEA_T – 2nd tertile</i>    | .964      | 66        | .054     | .80              | 2          | 195        | .449     |
| <i>PEA T - 3rd tertile</i>    | .920      | 66        | <.001    |                  |            |            |          |

*Note.*

SW = Shapiro-Wilk

L = Levene

\* = denotes transformed variables. RT and accuracy variables were transformed using natural log and square root, respectively

**Table S1 2.***Normality and Homogeneity analyses for neural measures*

|                            | Normality |           |          | Homoscedasticity |            |            |          |
|----------------------------|-----------|-----------|----------|------------------|------------|------------|----------|
|                            | <i>SW</i> | <i>df</i> | <i>p</i> | <i>L</i>         | <i>df1</i> | <i>df2</i> | <i>p</i> |
| <i>ERN – 1st tertile</i>   | .982      | 58        | .563     |                  |            |            |          |
| <i>ERN – 2nd tertile</i>   | .970      | 58        | .157     | 2.09             | 2          | 171        | .127     |
| <i>ERN – 3rd tertile</i>   | .992      | 58        | .961     |                  |            |            |          |
| <i>THETA – 1st tertile</i> | .983      | 58        | .601     |                  |            |            |          |
| <i>THETA – 2nd tertile</i> | .982      | 58        | .529     | .16              | 2          | 171        | .774     |
| <i>THETA – 3rd tertile</i> | .982      | 58        | .530     |                  |            |            |          |
| <i>RSI - 1st tertile</i>   | .978      | 58        | .378     |                  |            |            |          |
| <i>RSI – 2nd tertile</i>   | .951      | 58        | .021     | 8.63             | 2          | 171        | <.001    |
| <i>RSI – 3rd tertile</i>   | .951      | 58        | .021     |                  |            |            |          |
| <i>RSI – 1st tertile*</i>  | .969      | 58        | .145     |                  |            |            |          |
| <i>RSI – 2nd tertile*</i>  | .926      | 58        | .002     | 25.83            | 2          | 171        | <.001    |
| <i>RSI – 3rd tertile*</i>  | .927      | 58        | .002     |                  |            |            |          |

*Note.*

SW = Shapiro-Wilk

L = Levene

\* = denotes transformed variables. The variables were transformed using natural log
