# Supplementary material for: EEG Dynamics of Error Processing and Associated Behavioral Adjustments in Preschool Children
Source: MDPI journal article supplement (doi:10.3390/brainsci13040575), 2023-03-29
Supplement: s1 [file s1]

### Supplemental Material S3

#### Number of trials included in the study

**Table S3 1.**

*Number of trials for each variable used in the analysis*

| <b><i>Behavioral measures</i></b>                                   | <b>Median</b> | <b>Min</b> | <b>Max</b> |
|---------------------------------------------------------------------|---------------|------------|------------|
| <i>Correct-trial RT (ms)</i>                                        | 326           | 46         | 503        |
| <i>Error-trial RT (ms)</i>                                          | 67            | 8          | 177        |
| <i>Post-correct slowing (ms)</i>                                    | 39            | 7          | 129        |
| <i>Post-error slowing (ms)</i>                                      | 39            | 7          | 129        |
| <i>Post-correct accuracy (%)</i>                                    | 39            | 7          | 129        |
| <i>Post-error accuracy (%)</i>                                      | 39            | 7          | 129        |
| <b><i>Neural measures</i></b>                                       | <b>Median</b> | <b>Min</b> | <b>Max</b> |
| <i>Correct-related activity</i>                                     | 311           | 45         | 497        |
| <i>Error-related activity</i>                                       | 60            | 8          | 169        |
| <i>Error-related activity before a correct response</i>             | 45            | 11         | 84         |
| <i>Error-related activity before an error response</i>              | 12            | 7          | 39         |
| <i>Error-related activity before a correct response 1st tertile</i> | 15            | 7          | 29         |
| <i>Error-related activity before a correct response 2nd tertile</i> | 14            | 7          | 27         |
| <i>Error-related activity before a correct response 3rd tertile</i> | 14            | 8          | 34         |
