# Supplementary material for: EEG Dynamics of Error Processing and Associated Behavioral Adjustments in Preschool Children
Source: Brain Sci. 2023 Mar 29;13(4):575. doi: 10.3390/brainsci13040575 (PMC10136969; doi:10.3390/brainsci13040575)
Supplement: Supplementary file 1 [file brainsci-13-00575-s001.zip]

Archive with 4 entries (4 files):
- Piettoetal_supplemental_material_S1.pdf
- Piettoetal_supplemental_material_S2.pdf
- Piettoetal_supplemental_material_S3.pdf
- Piettoetal_supplemental_material_S4.pdf
